# Supplementary material for: The origin of genetic instability in CCTG repeats
Source: PubMed Central journal article supplement — Nucleic Acids Res. 2011 Apr 7;39(14):6260–8. doi: 10.1093/nar/gkr185 (PMC3152338; doi:10.1093/nar/gkr185), 2011-04-07

# Supplementary Data for

## **The Origin of Genetic Instability in CCTG Repeats**

Sik Lok Lam\*, Feng Wu, Hao Yang and Lai Man Chi

Department of Chemistry, The Chinese University of Hong Kong, Shatin, N.T., Hong Kong

\* To whom correspondence should be addressed. Phone: (852) 2609-8126. Fax: (852) 2603-5057.

E-mail: [lams@cuhk.edu.hk](mailto:lams@cuhk.edu.hk)

This file includes Supplementary Figures S1 to S8.

**Figure S1.** NMR features of the stem region of (CCTG)<sub>3</sub> hairpin. **(A)** 2D WATERGATE-NOESY spectrum shows a NOE between G8 imino and C5 amino at 0 °C, confirming the formation of CT-loop with a G8·C5 closing base pair. **(B)** 2D NOESY H6/H8–H1' fingerprint region of (CCTG)<sub>3</sub> at 15 °C shows the signals of C9 and C10 are broadened while the signals of G8, T11 and G12 remain sharp, supporting the presence of C9- and C10-bulge conformers. **(C)** The two possible pairing modes of T·T mismatch.

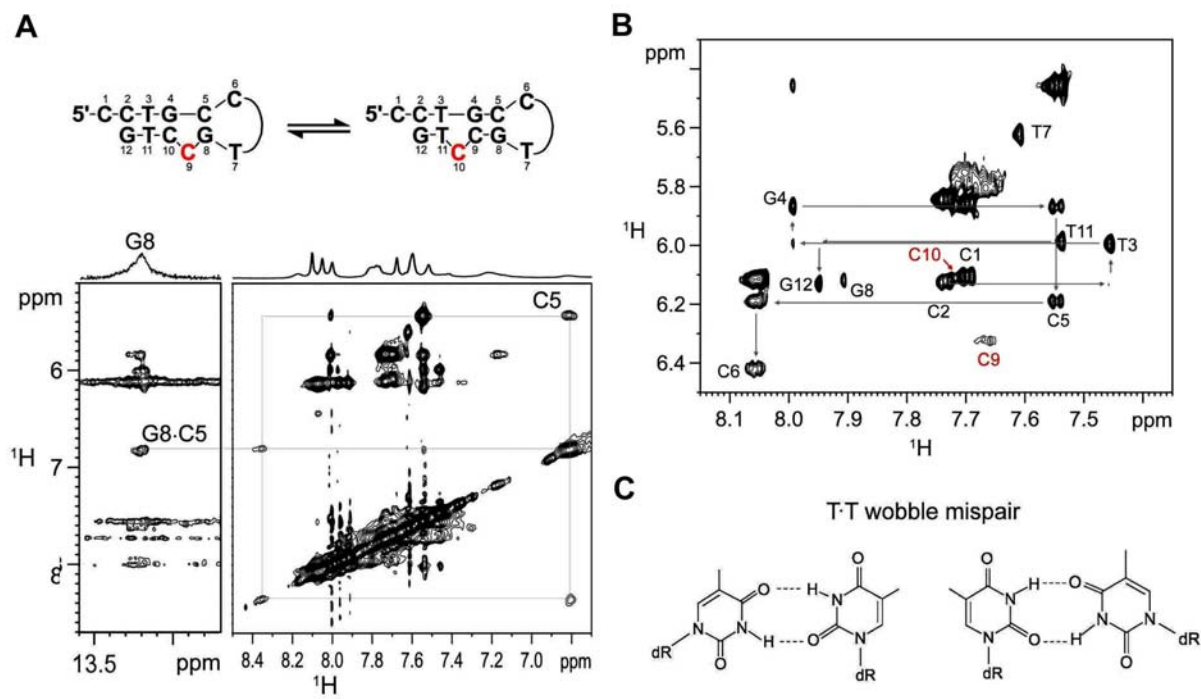

**Figure S2.** Effect of adding a G residue to the 3'-end of (CCTG)<sub>3</sub>. **(A)** The hairpin structures were stabilized after the addition of a G. **(B)** 2D WATERGATE-NOESY imino-amino and amino-amino regions of (CCTG)<sub>3</sub>G at 0 °C. **(C)** The broadening of the C10 H5-H6 TOCSY cross peak at 15 °C was less serious after the 3'-end was stabilized, revealing the C9-bulge conformer became predominant. **(D)** At 0 °C, the T3 and T11 imino signals appeared at ~10.9 and 11.3 ppm due to the reduced dynamics of the C-bulge. **(E)** 2D NOESY H6/H8–H1' fingerprint region of (CCTG)<sub>3</sub>G at 25 °C.

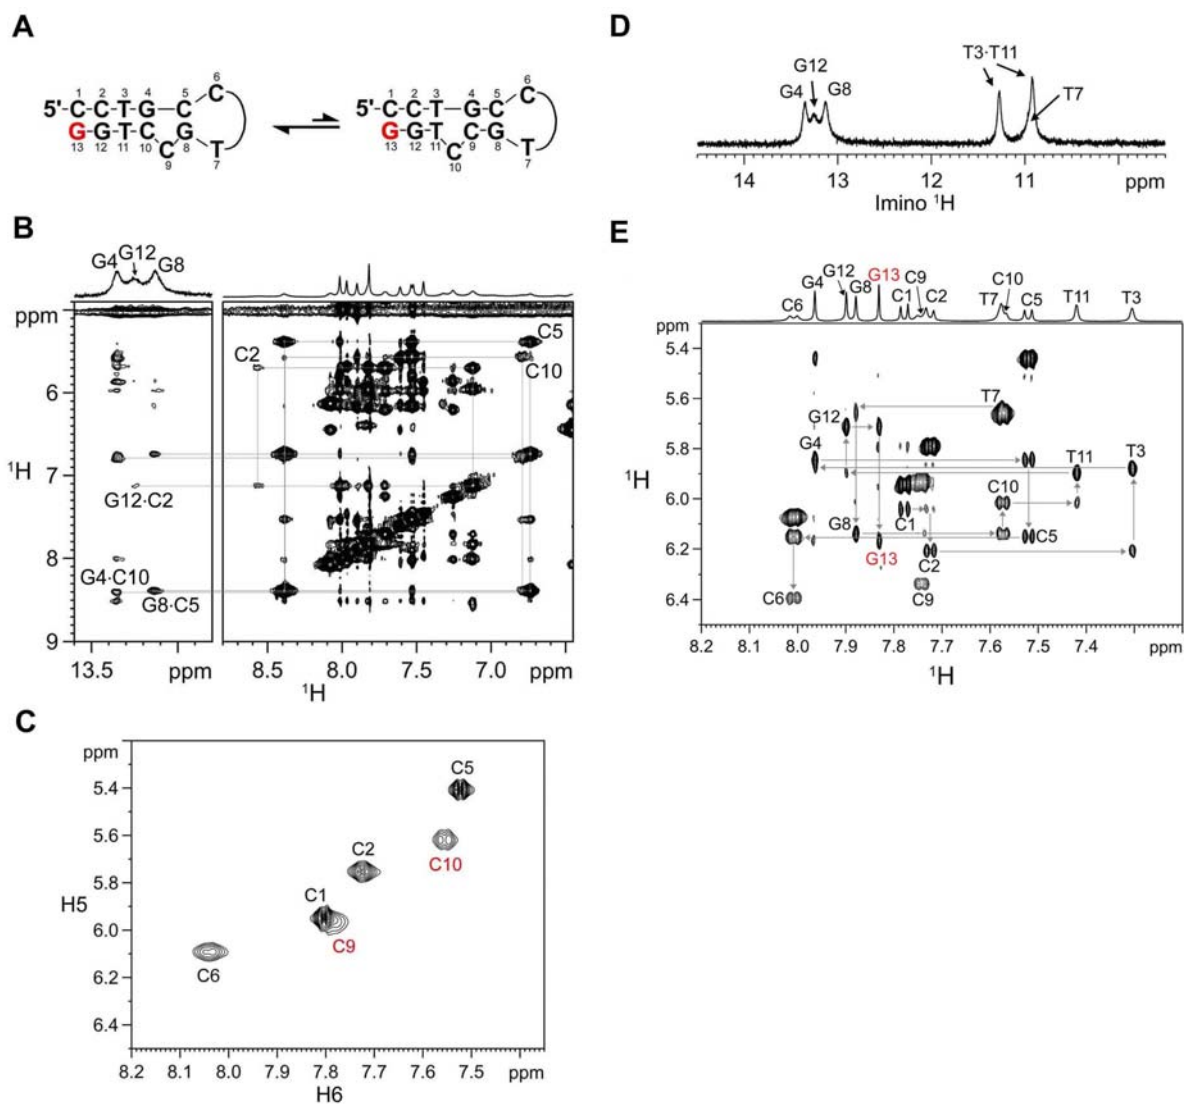

**Figure S3.** No TT-loop was formed in (CCTG)<sub>4</sub>-C2T, suggesting the first repeat of (CCTG)<sub>4</sub> is not involved in forming CT-loop. **(A)** Variable temperature <sup>1</sup>H NMR spectra showing the imino and thymine methyl <sup>1</sup>H regions. The intensity of the imino region has been scaled up eight times. No characteristic methyl peak of TT-loop was observed. **(B)** Variable temperature <sup>31</sup>P spectra showing characteristic peaks of CT-loops. **(C)** Conformational exchange was evidenced by ROESY exchange cross peaks (in black) at 0 °C. Positive and negative contours were plotted in black and red, respectively. **(D)** The exchange process was also supported by <sup>31</sup>P-<sup>31</sup>P EXSY cross peaks at 0 °C.

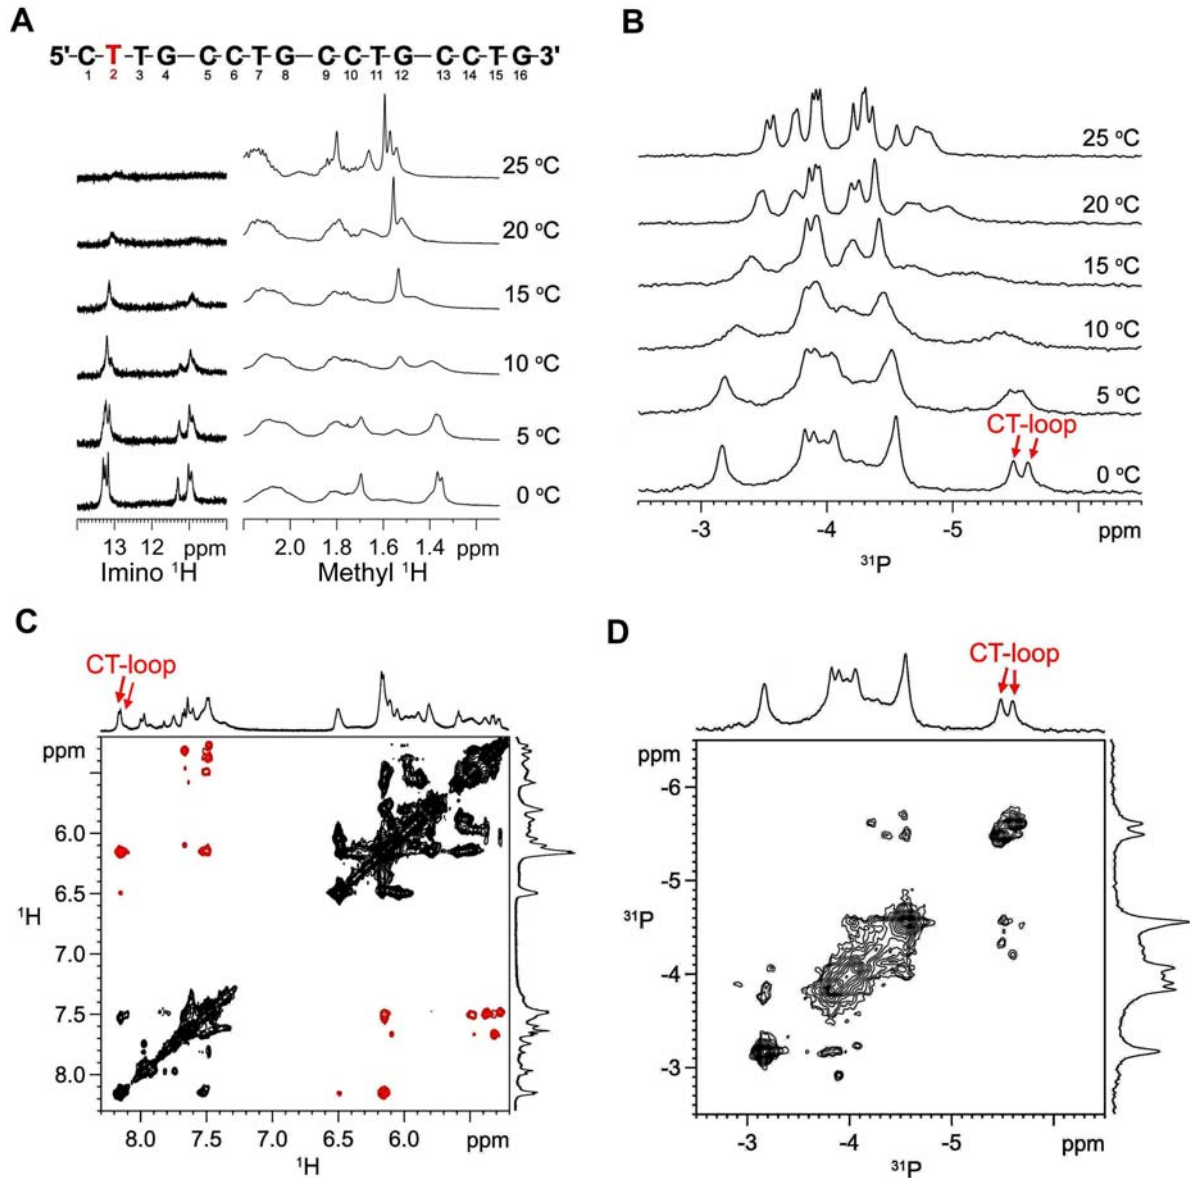

**Figure S4.** (CCTG)<sub>4</sub>-C6T forms a stable dumbbell hairpin with a TT- and a CT-loop. **(A)** No exchange cross-peak was observed in 2D <sup>31</sup>P–<sup>31</sup>P EXSY spectrum at 0 °C. The characteristic <sup>31</sup>P signals show the formation of a stable dumbbell containing a TT- and a CT-loop. **(B)** 2D NOESY H6/H8–H1' fingerprint region of (CCTG)<sub>4</sub>-C6T at 25 °C. The arrows show the sequential NOE connectivities. The G16–C2 NOE (in red) reveals the presence of intra-molecular 3'–5' terminal stacking interaction. **(C)** Variable temperature thymine methyl <sup>1</sup>H spectra. **(D)** Variable temperature <sup>31</sup>P spectra. **(E)** 2D WATERGATE-NOESY spectrum at 0 °C shows the presence of G8–C5, G16–C13 base pairs, supporting the formation of a TT- and CT-loop, respectively. **(F)** Imino–imino region shows the NOEs between G8 and G4. **(G)** TOCSY spectrum shows cytosine H5–H6 cross peaks at 25 °C. **(H)** The imino signals of the loop residues T7 and T15 appeared at ~11 ppm at 0 °C, overlapping with that of T3·T11 mispair.

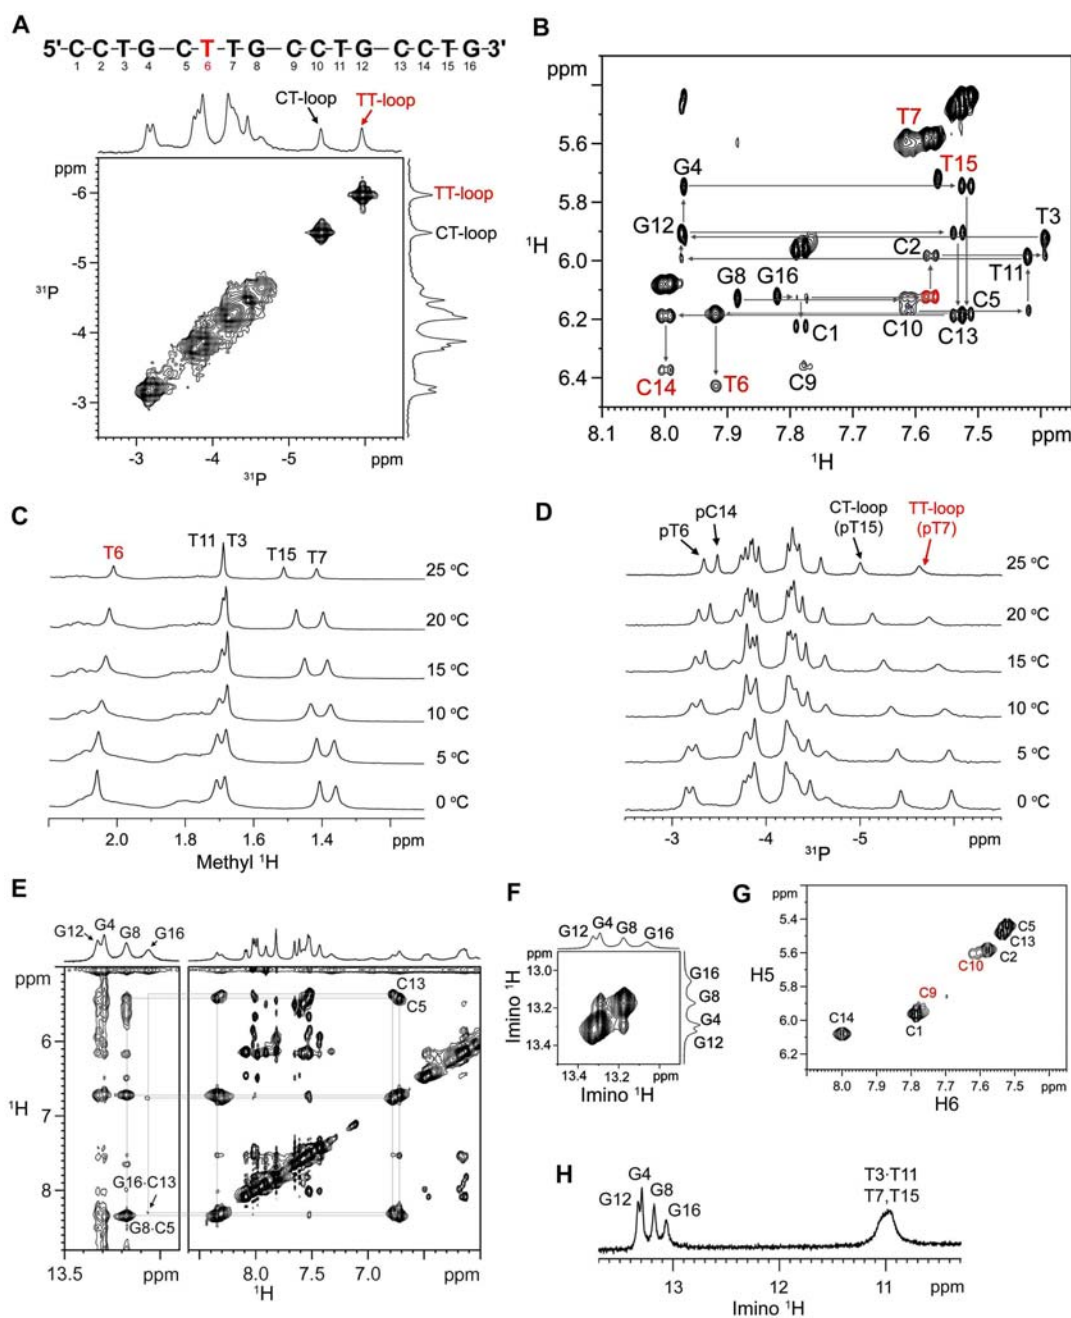

**Figure S5.** (CCTG)<sub>4</sub>-C10T adopts both hairpin and dumbbell conformations. **(A)** The formation of a minor conformer with a TT-loop was evidenced by an enormously upfield small <sup>31</sup>P signal at ~-6.0 ppm. **(B)** Variable temperature <sup>1</sup>H NMR spectra showing the imino and thymine methyl <sup>1</sup>H regions. The intensity of the imino region has been scaled up eight times. A downfield thymine methyl <sup>1</sup>H signal at ~2.08 ppm appeared at 0 °C also supports the TT-loop formation. **(C)** Two intense downfield cytosine H5–H6 TOCSY signals were observed at 0 °C, suggesting the major conformer contains two CT-loops. **(D)** 2D <sup>31</sup>P–<sup>31</sup>P EXSY spectrum at 0 °C shows exchange cross peaks. **(E)** Conformational exchange was evidenced by 2D ROESY exchange cross peaks (in black) at 0 °C. Positive and negative contours were plotted in black and red, respectively. **(F)** The thymine methyl protons also show ROESY exchange cross peaks at 0 °C.

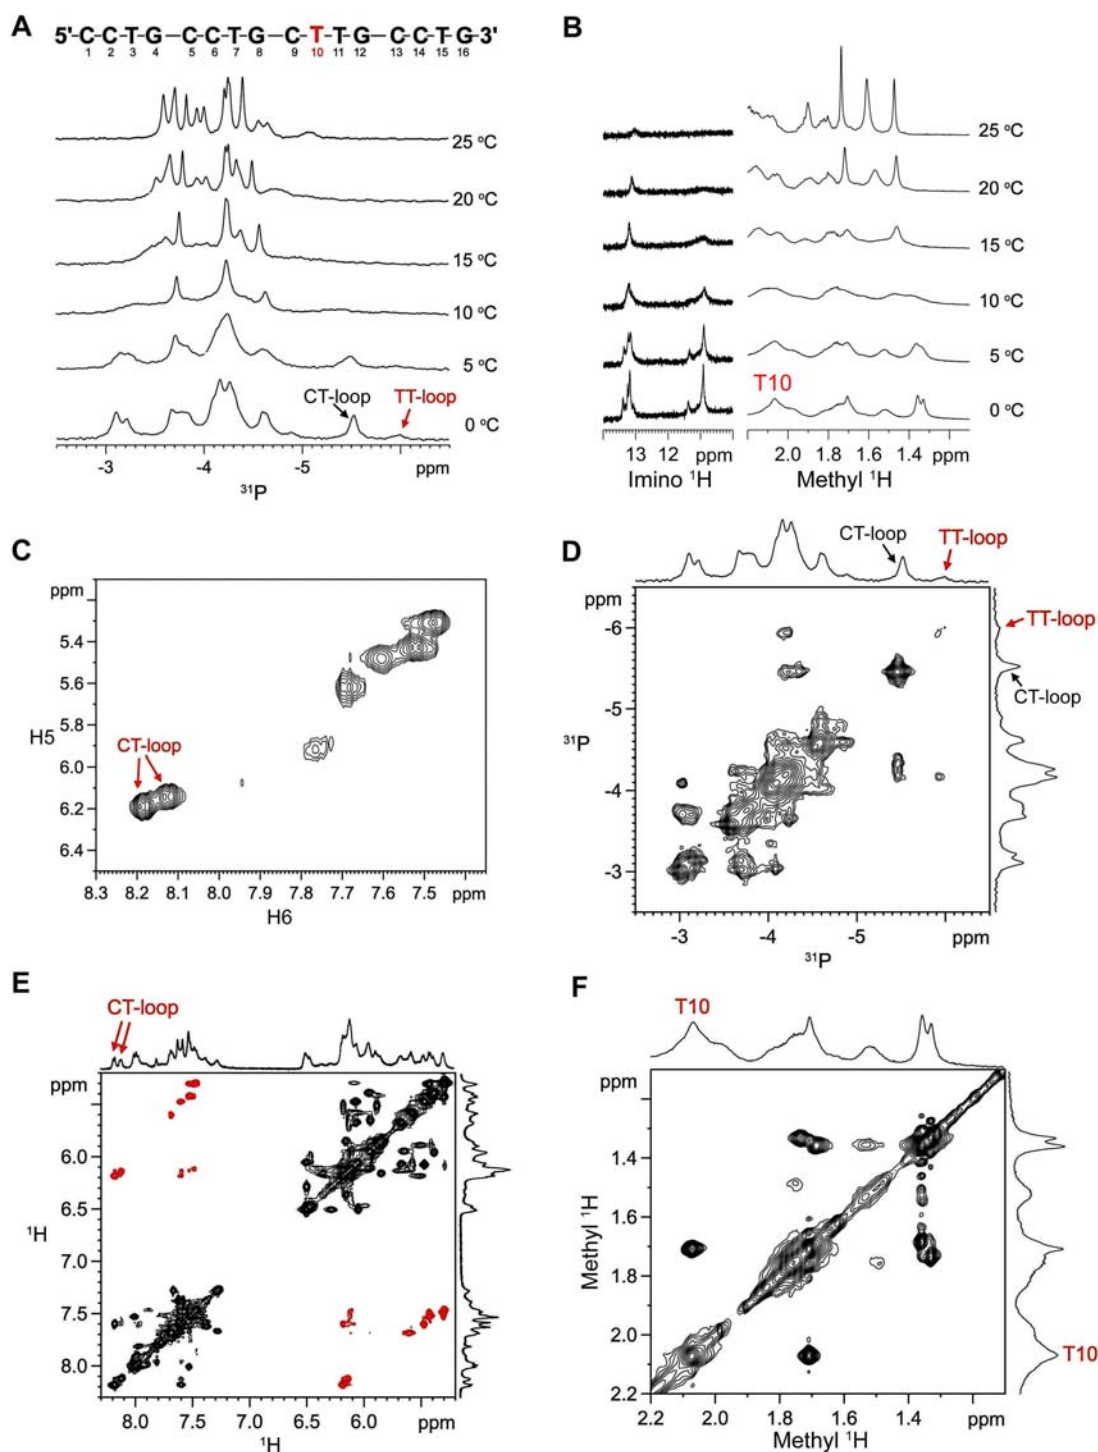

**Figure S6.** (CCTG)<sub>4</sub>-C14T forms a stable dumbbell hairpin with a TT- and a CT-loop. **(A)** Variable temperature <sup>1</sup>H NMR spectra showing the thymine methyl <sup>1</sup>H region. T14 has a characteristic downfield signal of TT-loop at 2.02 ppm. **(B)** Variable temperature <sup>31</sup>P NMR spectra showing the characteristic <sup>31</sup>P signals of CT- and TT-loops. **(C)** No exchange cross peak was observed in 2D <sup>31</sup>P-<sup>31</sup>P EXSY spectrum at 0 °C. **(D)** 2D NOESY H6/H8-H1' fingerprint region at 25 °C shows the sequential NOEs. The G16-C2 NOE (in red) reveals the presence of intra-molecular 3'-5' terminal stacking interaction. **(E)** TOCSY spectrum shows cytosine H5-H6 cross peaks at 25 °C. **(F)** The imino signals of the loop residues T7 and T15 appeared at ~11 ppm, overlapping with those of T3-T11 mispair at 0 °C.

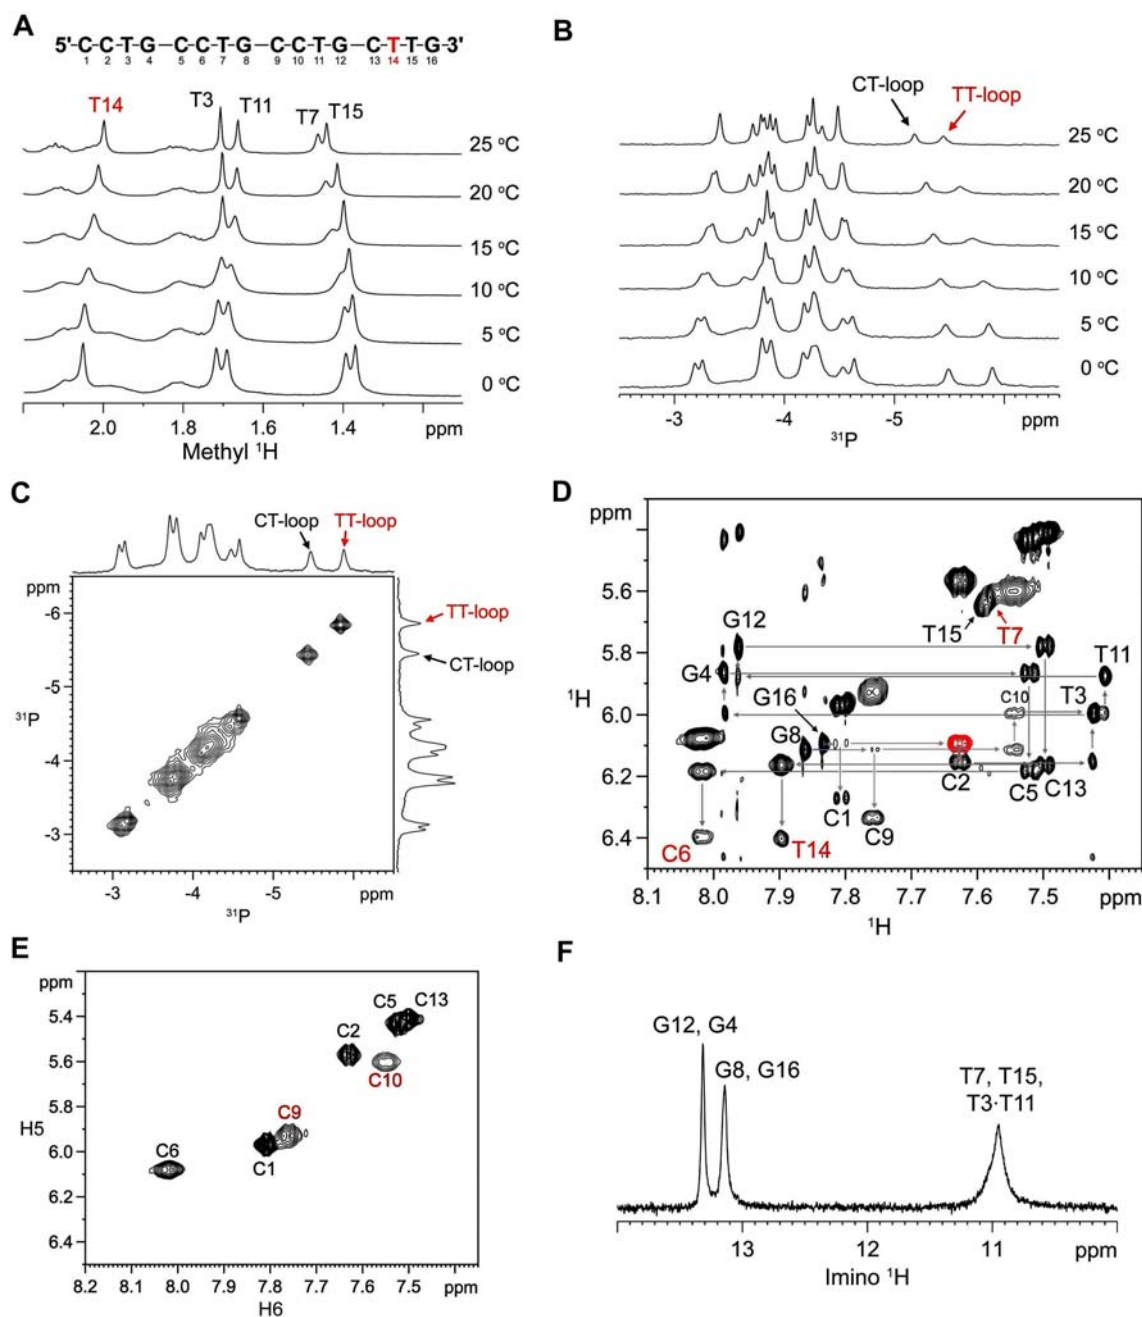

**Figure S7.** (CCTG)<sub>5</sub>-C18T possesses NMR characteristics of a TT- and a CT-loop. **(A)** Variable temperature <sup>1</sup>H NMR spectra showing the imino and thymine methyl <sup>1</sup>H regions. The intensity of the imino region has been scaled up eight times. T18 has a characteristic downfield signal of TT-loop at ~2.05 ppm. **(B)** TOCSY spectrum shows cytosine H5–H6 cross peaks at 0 °C. **(C)** Variable temperature <sup>31</sup>P NMR spectra showing the characteristic <sup>31</sup>P signals of CT- and TT-loops. **(D)** Exchange cross peaks were observed in 2D <sup>31</sup>P–<sup>31</sup>P EXSY spectrum at 0 °C.

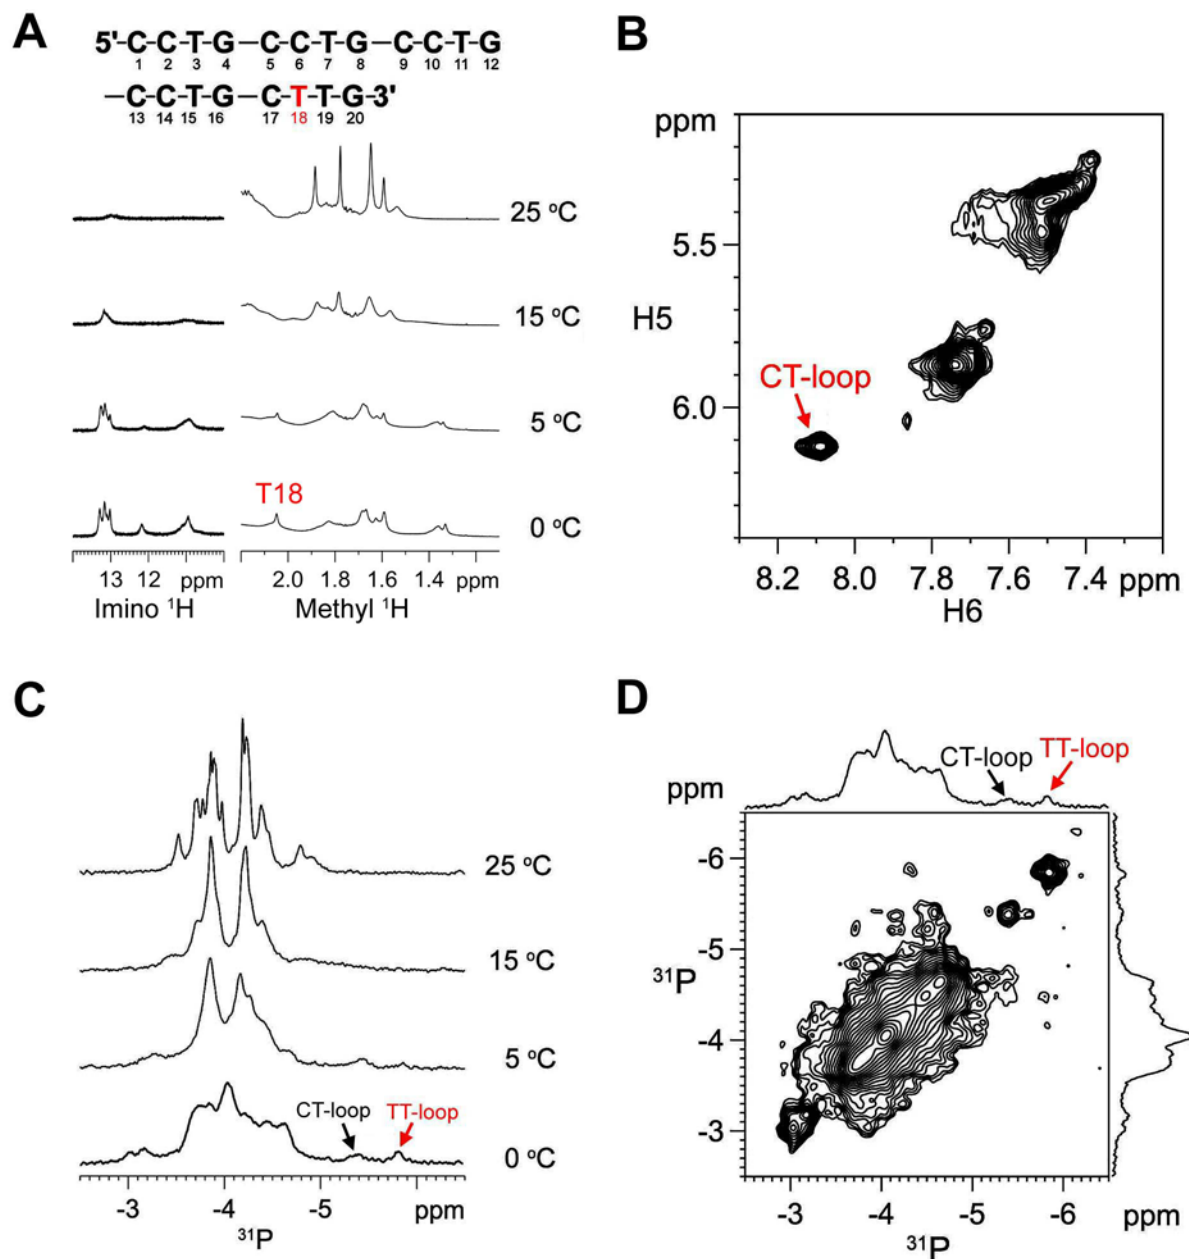



**Figure S8.** (CCTG)<sub>6</sub>-C22T possesses NMR characteristics of a TT- and a CT-loop. **(A)** Variable temperature <sup>1</sup>H NMR spectra showing the imino and thymine methyl <sup>1</sup>H regions. The intensity of the imino region has been scaled up eight times. T22 has a characteristic downfield signal of TT-loop at ~2.06 ppm. **(B)** TOCSY spectrum shows cytosine H5–H6 cross peaks at 0 °C. **(C)** Variable temperature <sup>31</sup>P NMR spectra showing the characteristic <sup>31</sup>P signals of CT- and TT-loops. **(D)** Exchange cross peaks were observed in 2D <sup>31</sup>P–<sup>31</sup>P EXSY spectrum at 10 °C.

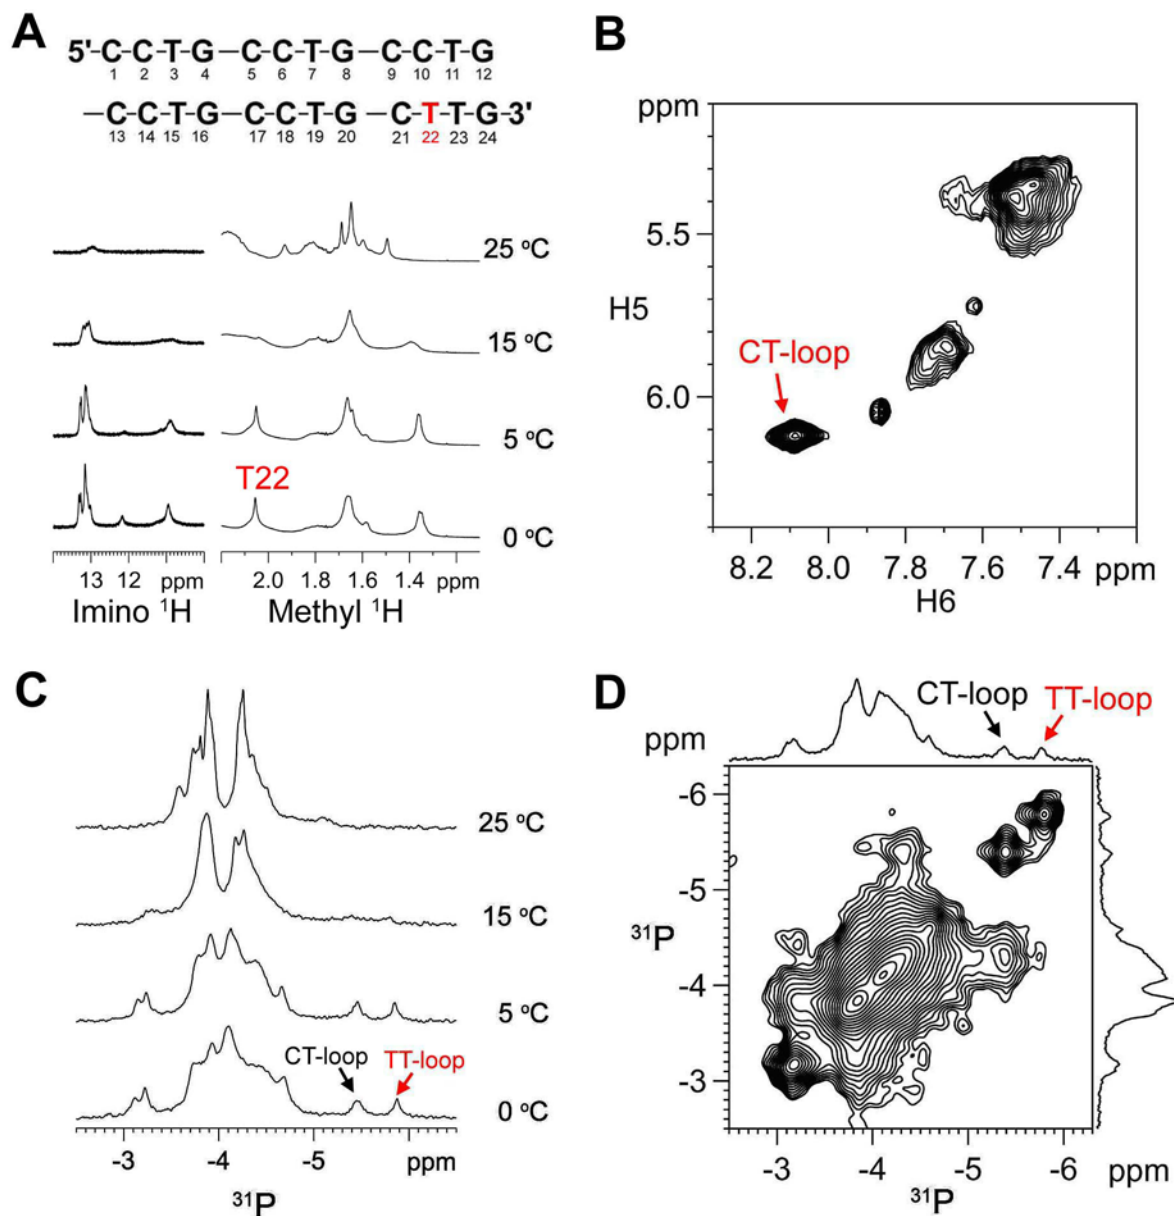

Supplement: supp_gkr185_R1_SM.pdf [file supp_gkr185_R1_SM.pdf]
